# Supplementary material for: Absence from work and return to work in people with back pain: a systematic review and meta-analysis
Source: PubMed Central journal article supplement — Occup Environ Med. 2013 Nov 1;71(6):448–56. doi: 10.1136/oemed-2013-101571 (PMC4033140; doi:10.1136/oemed-2013-101571), 2013-11-01
Supplement: oemed-2013-101571-s2.pdf [file oemed-2013-101571-s2.pdf]

**Online Table 2; Summary of studies included in the review**

*Studies reporting duration of work absence*

| <b>Author (years)</b>                                 | <b>Country</b> | <b>Setting</b>                          | <b>Participants</b>                                                                                                                                                           | <b>Data source for work absence</b> | <b>Follow-up</b>           | <b>Reported results: duration of work absence</b>                                                                                                                                                                         | <b>Risk of study participation bias (QUIPS tool)</b> |
|-------------------------------------------------------|----------------|-----------------------------------------|-------------------------------------------------------------------------------------------------------------------------------------------------------------------------------|-------------------------------------|----------------------------|---------------------------------------------------------------------------------------------------------------------------------------------------------------------------------------------------------------------------|------------------------------------------------------|
| <b>Samples identified from work absence databases</b> |                |                                         |                                                                                                                                                                               |                                     |                            |                                                                                                                                                                                                                           |                                                      |
| Hashemi et al (1998) [19]                             | USA            | Workers compensation insurance database | 148917 compensable low back pain claims                                                                                                                                       | Register                            | 1 year (1996)              | Median length of disability (number of days lost from work) 61 days                                                                                                                                                       | Low                                                  |
| Nyiendo et al (1991) [30]                             | USA            | Workers compensation insurance database | 201 with disabling compensable low back pain >3 workdays                                                                                                                      | Register                            | Over a period of 2.5 years | Chiropractic claimants: mean 41.1 days (SD 83.5)<br>Medical claimants: mean 39 days (SD 75)                                                                                                                               | Moderate                                             |
| Rossignol et al (1992) [22]                           | Canada         | Workers compensation insurance database | 2342 workers compensation claims for spinal injury (defined as musculoskeletal complaints related to the entire spine (cervical, thoracic, lumbar and sacral)) in Quebec 1981 | Register                            | 4 years                    | Initial episode: median 11 days<br>1 <sup>st</sup> recurrence: median 13 days<br>2 <sup>nd</sup> recurrence: median 14 days<br>3 <sup>rd</sup> recurrence: median 15 days<br>4 <sup>th</sup> recurrence: median 17.5 days | Moderate                                             |
| Shinohara et al (1998)                                | Japan          | Workers compensation                    | 177 with organic low back pain and                                                                                                                                            | Register                            | 5 years                    | Organic: mean 3.7 months ( $\pm$ 0.7)                                                                                                                                                                                     | High                                                 |

|                                                    |           |                          |                                                                                                |             |          |                                                                                                                                                                         |          |
|----------------------------------------------------|-----------|--------------------------|------------------------------------------------------------------------------------------------|-------------|----------|-------------------------------------------------------------------------------------------------------------------------------------------------------------------------|----------|
| [32]                                               |           | insurance database       | 176 with nonspecific low back pain                                                             |             |          | Non-specific: mean 1.2 months ( $\pm 0.4$ )                                                                                                                             |          |
| Soriano et al (2002) [23]                          | Argentina | Insurance database       | 330 patients consulting for acute low back pain while at work or while travelling to/from work | Register    | 6 months | Median work absence: 7 days (0-422 days)                                                                                                                                | Moderate |
| Vallfors et al (1985) [34]                         | Sweden    | Insurance database       | 50 people with low back pain who had not been absent from work in the past year                | Register    | 1 year   | Mean 10.5 days for those with objective findings<br>Mean 7 days for those without objective findings (i.e. normal movement ability, no signs of neurologic involvement) | High     |
| *Watson et al (1998) [35]                          | UK        | Social security database | 2291 claims with specific and non-specific low back pain                                       | Register    | 3 years  | 1 <sup>st</sup> absence: mean 20.73 days (SD 38.9)<br>2 <sup>nd</sup> absence: mean 36.8 (SD 61.4)                                                                      | Moderate |
| <b>Population sample</b>                           |           |                          |                                                                                                |             |          |                                                                                                                                                                         |          |
| *Biering-Sorensen et al (1984) [18]                | Denmark   | Population sample        | 357 (193 men, 164 women) with low back pain                                                    | Self-report | 1 year   | Median days off work<br>Men: 12 days<br>Women: 7 days                                                                                                                   | Low      |
| <b>Samples identified from healthcare settings</b> |           |                          |                                                                                                |             |          |                                                                                                                                                                         |          |
| *Henschke et al (2008) [20]                        | Australia | Primary care clinics     | 770 with low back pain for <2 weeks preceded by no low back pain for                           | Self-report | 1 year   | Median 14 days                                                                                                                                                          | Low      |

|                                                   |        |                                                                                                                                        |                                                                                                                                                                                                           |             |                                               |                                                                                              |          |
|---------------------------------------------------|--------|----------------------------------------------------------------------------------------------------------------------------------------|-----------------------------------------------------------------------------------------------------------------------------------------------------------------------------------------------------------|-------------|-----------------------------------------------|----------------------------------------------------------------------------------------------|----------|
|                                                   |        |                                                                                                                                        | at least 1 month,<br>291 reported<br>changing their<br>working status                                                                                                                                     |             |                                               |                                                                                              |          |
| Lanier et al<br>(1988) [28]                       | USA    | Primary care                                                                                                                           | 104 patients<br>consulting their<br>family physician<br>with low back pain                                                                                                                                | Self-report | 3 months                                      | Mean: 6.6 days<br>manual labourers<br>Mean: 3.6 days<br>professional or<br>technical workers | Moderate |
| Valat et al<br>(2000) [33]                        | France | Primary care                                                                                                                           | 2487 working with<br>an episode of acute<br>low back pain with<br>or without<br>radiation in the<br>lower limbs,<br>referred for the<br>first time<br>(symptoms<br>developing for no<br>more than a week) | Self-report | 42 days ( $\pm$<br>15) after<br>initial visit | Mean: 9 ( $\pm$ 7) days                                                                      | Low      |
| *Vingard et<br>al (2002)<br>[26]                  | Sweden | Primary care<br>Occupational<br>physicians<br>Hospital<br>physicians<br>Physiotherapists<br>Chiropractors<br>Alternative<br>therapists | 791 patients with<br>new episode of<br>low back pain, not<br>having sought care<br>during the<br>preceding 6<br>months                                                                                    | Self-report | last 12<br>months of 24<br>month follow<br>up | Median: 24 days (3-<br>365) women<br>Median: 14 days (2-<br>365) men                         | Moderate |
| <b>Samples identified from workplace settings</b> |        |                                                                                                                                        |                                                                                                                                                                                                           |             |                                               |                                                                                              |          |
| **Hiebert et                                      | USA    | Utility company                                                                                                                        | 240 workers                                                                                                                                                                                               | Register    | 1 year                                        | Median: 14 days                                                                              | Low      |

|                               |                 |                                 |                                                                                                                         |             |              |                                                                                  |          |
|-------------------------------|-----------------|---------------------------------|-------------------------------------------------------------------------------------------------------------------------|-------------|--------------|----------------------------------------------------------------------------------|----------|
| al (2003)<br>[21]             |                 |                                 | visiting medical department at utility company for nonspecific low back pain with lost work time                        |             |              | employees with restrictions<br>Median: 15 days<br>employees without restrictions |          |
| Jensen et al (2010) [27]      | Denmark         | Health and elderly care workers | 1724 female healthcare workers with low back pain $\geq 1$ day during the previous 1 year                               | Self-report | 1 year       | Mean: 21.2 days (0-365)                                                          | Low      |
| McEllingott et al (1989) [29] | USA             | Industrial plant                | 280 with work-related back injuries & 740 with non-work related back injuries both incurring costs due to time off work | Register    | 1 year       | Mean: 5.2 days (work related)<br>Mean: 5.1 days (non-work related)               | Moderate |
| Peek-Asa et al (2004) [31]    | USA             | Retail                          | 2152 with acute low back injuries, occurrence at work, verified by physician                                            | Register    | 5 years      | Mean: 5.6 days age <45<br>Mean: 9 days age 45-54<br>Mean: 8.5 days Age 55+       | Moderate |
| **Steenstra et al (2005) [24] | The Netherlands | Hospital employees              | 615 who reported sick leave due to non-specific low back pain for more than 1 day over a 2-year period                  | Self-report | 6 months     | Median: 5 days (IQR 2-12)                                                        | Low      |
| **Troup et al                 | UK              | Collieries                      | 802 participants                                                                                                        | Self report | 1 year and 2 | Mean: 7.01 weeks (1-                                                             | High     |

|             |  |                                 |                                                                                                                                                                                                                                        |  |       |                                           |  |
|-------------|--|---------------------------------|----------------------------------------------------------------------------------------------------------------------------------------------------------------------------------------------------------------------------------------|--|-------|-------------------------------------------|--|
| (1981) [25] |  | Glass industry<br>Motor company | interviewed and examined in medical centres after episodes of back pain, on return to work after sickness absence. Or in cases not absent from work after completion of treatment, or after reporting a back injury sustained at work. |  | years | 68 weeks)<br>Median: 28 days (4.06 weeks) |  |
|-------------|--|---------------------------------|----------------------------------------------------------------------------------------------------------------------------------------------------------------------------------------------------------------------------------------|--|-------|-------------------------------------------|--|

*Studies reporting occurrence of work absence*

| Author (years)                                        | Country | Setting                        | Participants                                             | Data source for work absence | Follow-up    | Reported results: proportion with work absence | Risk of study participation bias (QUIPS tool) |
|-------------------------------------------------------|---------|--------------------------------|----------------------------------------------------------|------------------------------|--------------|------------------------------------------------|-----------------------------------------------|
| <b>Samples identified from work absence databases</b> |         |                                |                                                          |                              |              |                                                |                                               |
| *Holtermenn et al (2010) [36]                         | Denmark | National compensation database | 676 employees with low back pain                         | Register                     | Over 2 years | 142/676 (21.0%)                                | Moderate                                      |
| *Watson et al (1998) [35]                             | UK      | Social security database       | 2291 claims with specific and non-specific low back pain | Register                     | Over 3 years | 144/2291 (6.28%)                               | Moderate                                      |
| <b>Population samples</b>                             |         |                                |                                                          |                              |              |                                                |                                               |

|                                                    |           |                                     |                                                                                               |             |                                                               |                                                                       |          |
|----------------------------------------------------|-----------|-------------------------------------|-----------------------------------------------------------------------------------------------|-------------|---------------------------------------------------------------|-----------------------------------------------------------------------|----------|
| *Biering-Sorensen et al (1984) [18]                | Denmark   | Population sample                   | 357 (193 men, 164 women) with low back pain                                                   | Self-report | Over 1 year                                                   | Men 15% (29/193)<br>Women 14% (23/163)                                | Low      |
| *Demmelmaier et al (2010) [37]                     | Sweden    | Population sample                   | 313 reporting non-specific back pain                                                          | Self-report | Over 12 months                                                | 58/313= 18.5%                                                         | Moderate |
| *Nyman et al (2007) [38]                           | Sweden    | Population sample                   | 120 with low back pain and 271 with neck shoulder disorder<br>Working at least 50%            | Register    | Over a period of 5 years                                      | 50/120 (42%)                                                          | Moderate |
| <b>Samples identified from healthcare settings</b> |           |                                     |                                                                                               |             |                                                               |                                                                       |          |
| *Grotle et al (2007) [39]                          | Norway    | Primary care                        | 112 with acute low back pain of <3 weeks duration and no previous treatment for low back pain | Self-report | 1 month<br>3 months<br>6 months<br>9 months<br>12 months      | 12/106 (11%)<br>10/110 (9%)<br>7/109 (8%)<br>7/109 (8%)<br>9/103 (9%) | Low      |
| *Henschke et al (2008) [20]                        | Australia | Primary care clinics                | 770 with low back pain for < 2 weeks preceded by no low back pain for at least 1 month        | Self-report | 6 weeks<br>3 months<br>12 months                              | 17/770 (2.2%)<br>12/770 (1.6%)<br>12/770 (1.6%)                       | Low      |
| *Kovacs et al (2007) [61]                          | Spain     | Primary care and outpatient clinics | 165 workers consulting their physician for low back pain                                      | Register    | 12 months (<60 days absence)<br>12 months (> 60 days absence) | 46/165 (27.9%)<br>42/165 (25.4%)                                      | Low      |
| *Schlottz-Christensen et                           | Denmark   | Primary care                        | 503 consulting with back pain of                                                              | Self-report | 1 month<br>6 month                                            | 15/503 (3%)<br>15/503 (3%)                                            | Low      |

|                                                   |                    |                            |                                                                                                                                          |             |                                           |                                                                                                                     |          |
|---------------------------------------------------|--------------------|----------------------------|------------------------------------------------------------------------------------------------------------------------------------------|-------------|-------------------------------------------|---------------------------------------------------------------------------------------------------------------------|----------|
| al (1999) [40]                                    |                    |                            | less than 14 days duration                                                                                                               |             | 12 months                                 | 10/503 (2%)                                                                                                         |          |
| *Vingard et al (2002) [26]                        | Sweden             | Healthcare                 | 791 patients with new episode low back pain, not having sought care during preceding 6 months                                            | Self-report | Last 12 months of the 24 months follow up | Women: 44/449 (9.7%)<br>Men: 35/342 (10.2%)                                                                         | Moderate |
| *Wynne-Jones et al (2008) [41]                    | UK                 | Primary care               | 597 consulting their GP with low back pain                                                                                               | Self-report | 1 year                                    | 17/253 (6.7%) (16.6%)                                                                                               | Moderate |
| <b>Samples identified from workplace settings</b> |                    |                            |                                                                                                                                          |             |                                           |                                                                                                                     |          |
| *Alexopoulos et al (2008) [42]                    | Greece             | Ship building company      | 312 employees with back pain                                                                                                             | Register    | 1 year                                    | 74/312 (23.7%)                                                                                                      | Low      |
| *Murtezani et al (2010) [43]                      | Republic of Kosovo | Energetic corporation      | 430 blue and 59 white collar workers with back pain                                                                                      | Self-report | 1 year                                    | Blue collar: 88/430 20.5% <7 days; 129/430 30% >7 days<br><br>White collar: 26/59 44.1% <7 days; 7/59 11.9% >7 days | Low      |
| *Van den Heuvel et al (2004) [44]                 | The Netherlands    | 34 participating companies | 629 observations in blue collar, white collar, and workers in care professions with back pain who had been employed in their current job | Register    | 3 years                                   | 113/629 (18%)                                                                                                       | Moderate |

|  |  |  |                                                                    |  |  |  |  |
|--|--|--|--------------------------------------------------------------------|--|--|--|--|
|  |  |  | for at least 1 year and who were working more than 24 hours a week |  |  |  |  |
|--|--|--|--------------------------------------------------------------------|--|--|--|--|

*Studies reporting return to work*

| Author (years)                                        | Country | Setting                       | Participants                                                                                                | Data source for work absence | Follow-up time                   | Reported results: Proportion on sick leave returning to work | Risk of study participation bias (QUIPS tool) |
|-------------------------------------------------------|---------|-------------------------------|-------------------------------------------------------------------------------------------------------------|------------------------------|----------------------------------|--------------------------------------------------------------|-----------------------------------------------|
| <b>Samples identified from work absence databases</b> |         |                               |                                                                                                             |                              |                                  |                                                              |                                               |
| ** Cote et al (2008) [45]                             | USA     | Workers compensation database | 1831 workers who filed a workers' compensation claim for back pain                                          | Self-report                  | 1 month<br>6 months<br>12 months | 1194/1321 (90.4%)<br>780/810 (96.3%)<br>449/462 (97.1%)      | Moderate                                      |
| ** Kapoor et al (2006) [46]                           | USA     | Workers compensation database | 300 workers seeking compensation and treatment for acute (<14 days since onset), non-specific low back pain | Register                     | 1 month<br>3 months              | 156/275 (57%)<br>202/274 (74%)                               | Low                                           |
| ** Krause et al (1999) [47]                           | USA     | Workers compensation database | 850 workers with permanent or temporary disability ( at least 3 days) due to low                            | Register                     | 1 month<br>12 months             | 507/850 (59.6%)<br>816/850 (96%)                             | Low                                           |



|                                                    |        |                                                 |                                                                                                                                                    |             |                                          |                                                                              |     |
|----------------------------------------------------|--------|-------------------------------------------------|----------------------------------------------------------------------------------------------------------------------------------------------------|-------------|------------------------------------------|------------------------------------------------------------------------------|-----|
|                                                    |        |                                                 | back pain, non-traumatic injury, physician diagnosis (MD, osteopath or chiropractor)                                                               |             |                                          |                                                                              |     |
| **Oleinick et al (1996) [48]                       | USA    | Workers compensation database                   | 8628 with disabling compensable low back pain >7 workdays (claims)                                                                                 | Register    | 8 weeks                                  | 6445/8628 (74.7%)                                                            | Low |
| **Steenstra et al (2010) [49]                      | Canada | Workers compensation database                   | 442 with new, accepted or pending, work related back injury lost-time claim, absent from work at least 5 days within the first 14 days post-injury | Self-report | 1 month<br>6 months                      | 258/442 (58.4%)<br>233/442 (52.7%)                                           | Low |
| **Tellnes et al (1989) [50]                        | Norway | National insurance database                     | 493 with sickness certificates related to back pain                                                                                                | Register    | 1 month<br>1-6 months<br>>6 months       | 324/493 (65.7%)<br>474/493 (96.1%)<br>487/493 (98.8%)                        | Low |
| <b>Samples identified from healthcare settings</b> |        |                                                 |                                                                                                                                                    |             |                                          |                                                                              |     |
| **Coste et al (1994) [51]                          | France | Primary care                                    | 75 patients consulting their doctor for back pain                                                                                                  | Self-report | 1 month<br>90 days                       | 58/75 (78%)<br>71/75 (95%)                                                   | Low |
| **Dionne et al (2007) [52]                         | Canada | Emergency departments and family medicine units | 1007 consulting for back pain & absent ≥1 day due to back pain                                                                                     | Self-report | 6 weeks<br>12 weeks<br>1 year<br>2 years | 164/923 (17.80%)<br>467/907 (51.50%)<br>500/913 (54.80%)<br>489/864 (56.60%) | Low |
| **Eilat-                                           | Israel | Military clinics                                | 160 soldiers whose                                                                                                                                 | Self-report | 6 weeks                                  | 126/160 (78.8%)                                                              | Low |

|                                     |        |                            |                                                                                                                                                                              |             |                                                       |                                                                                                       |          |
|-------------------------------------|--------|----------------------------|------------------------------------------------------------------------------------------------------------------------------------------------------------------------------|-------------|-------------------------------------------------------|-------------------------------------------------------------------------------------------------------|----------|
| Tsanani et al (2010) [53]           |        |                            | first visit to the clinic was for acute low back pain                                                                                                                        |             |                                                       |                                                                                                       |          |
| ** Hadler et al (1995) [60]         | USA    | Primary care               | 1366 patients coping with episode of back pain for less than 10 weeks without seeking care from elsewhere                                                                    | Self-report | 2 weeks<br>4 weeks<br>8 weeks<br>12 weeks<br>24 weeks | 1321/1366 (96.7%)<br>1340/1366 (98.1%)<br>1347/1366 (98.6%)<br>1354/1366 (99.1%)<br>1361/1366 (99.6%) | Moderate |
| ** Infante-Rivard et al (1996) [54] | Canada | Health centres             | 305 workers with compensated low back pain                                                                                                                                   | Self-report | 112 days<br>270 days                                  | 153/305 (50%)<br>271/305 (88.7%)                                                                      | Low      |
| ** Linton et al (1998) [55]         | Sweden | Primary care               | 137 patients consulting family physician with acute low back or neck pain, 52 on sick leave                                                                                  | Self-report | Within 1 month                                        | 25/52 (48%)                                                                                           | Low      |
| ** Nordin et al (1997) [56]         | USA    | Primary and secondary care | 557 episodes from 162 employees having lost-work episodes of non-specific low back pain, within 1 week of episode onset, initial visit at company occupational health clinic | Register    | 1 month                                               | 314/557 (56.4%)                                                                                       | Moderate |
| ** Reis et al (1999) [57]           | Israel | Primary care               | 178 patients who had the chief                                                                                                                                               | Self-report | 2 months                                              | 94/110 (85%)                                                                                          | Low      |

|                                                   |        |                             |                                                                                                                                                                                                                                                        |                                          |                   |                                    |      |
|---------------------------------------------------|--------|-----------------------------|--------------------------------------------------------------------------------------------------------------------------------------------------------------------------------------------------------------------------------------------------------|------------------------------------------|-------------------|------------------------------------|------|
|                                                   |        |                             | complaint of a new episode of low back pain and were employed, 110 absent at baseline                                                                                                                                                                  |                                          |                   |                                    |      |
| **Reiso et al (2003) [62]                         | Norway | Hospital outpatient clinic  | 190 patients with back pain certified as sick, with or without radiating pain                                                                                                                                                                          | Self-report and register (for sick cert) | 2 years           | 130/190 (68.4%)                    | Low  |
| **Shaw et al (2009) [58]                          | USA    | Occupational health clinics | 568 with non-specific low back pain (<14 days), pain presumed to be work-related                                                                                                                                                                       | Register                                 | 12 weeks          | 417/519 (80.3%)                    | Low  |
| **Troup et al (1981) [25]                         | UK     | Medical centre              | 802 participants interviewed and examined in medical centres after episodes of back pain, on return to work after sickness absence. Or in cases not absent from work after completion of treatment, or after reporting a back injury sustained at work | Self-report                              | 1 year<br>2 years | 280/503 (55.7%)<br>122/177 (68.9%) | High |
| <b>Samples identified from workplace settings</b> |        |                             |                                                                                                                                                                                                                                                        |                                          |                   |                                    |      |
| **Hiebert et                                      | USA    | Work medical                | 240 workers                                                                                                                                                                                                                                            | Register                                 | 1 year            | 223/225 (99%)                      | Low  |

|                                     |                    |                                                                                                                                        |                                                                                                                                                                                                  |             |                                                  |                                                                                                                 |     |
|-------------------------------------|--------------------|----------------------------------------------------------------------------------------------------------------------------------------|--------------------------------------------------------------------------------------------------------------------------------------------------------------------------------------------------|-------------|--------------------------------------------------|-----------------------------------------------------------------------------------------------------------------|-----|
| al (2003)<br>[21]                   |                    | department<br>(utility<br>company)                                                                                                     | visiting medical<br>dept at utility<br>company for<br>nonspecific low<br>back pain with lost<br>work time                                                                                        |             |                                                  |                                                                                                                 |     |
| **Nordin et<br>al (2002)<br>[59]    | USA                | Utility<br>company and a<br>public<br>transportation<br>authority<br>(occupational<br>health clinics<br>within these<br>organisations) | 1652 (utility)<br>episodes and 730<br>(transport)<br>episodes<br>Employees having<br>lost-work episode<br>of non-specific low<br>back pain, visit at<br>company<br>occupational health<br>clinic | Register    | 1 month<br>12 months<br><br>1 month<br>12 months | Utility company:<br>998/1652 (60%)<br>1637/1652 (99.1%)<br><br>Transport:<br>325/730 (44.5%)<br>700/730 (95.9%) | Low |
| **Steenstra<br>et al (2005)<br>[24] | The<br>Netherlands | Health care<br>workers                                                                                                                 | 615 who reported<br>sick leave due to<br>non-specific low<br>back pain for more<br>than 1 day over a 2<br>year period                                                                            | Self-report | 4 weeks<br>13 weeks                              | 547//615 (88.9%)<br>584/615 (95%)                                                                               | Low |

\* Studies included in the work absence meta-analysis

\*\* Studies included in the return to work meta-analysis

All other studies provided data on duration of absence but were not included in the meta-analyses

Only 4 studies provided information on duration of work absence at the time of the study inception; Steenstra *et al* (2010) [49]– At 1<sup>st</sup> interview participants had a mean of 18.8 (SD6.43) days missed due to injury. Hadler *et al* (1995) [60] – In the 30 days prior to the baseline interview insured patients had 3.2 days of absence compared to 2.6 days of absence in uninsured patients. Linton *et al* (1998) [55]– Of the sample 62% reported no days absence over the previous 12 months, 18% reported 1-30 days absence over the past 12 months and 20% reported  $\geq 30$  days absence over the past 12 months. Note that 12 months covers the period of follow-up (6 months) plus the period before

entry into the study (6 months). Nordin *et al* (2002) [59] - Duration of absence was <28 days in 60% of participants employed in a utility company and 45% in participants employed in a transportation authority.
