# Supplementary material for: Absence from work and return to work in people with back pain: a systematic review and meta-analysis
Source: HighWire-hosted journal article supplement (doi:10.1136/oemed-2013-101571), 2013-11-01
Supplement: oemed-2013-101571supp_table1.pdf [file oemed-2013-101571supp_table1.pdf]

**Online table 1: Summary of general characteristics of included studies**

| Characteristic                                          | N(range) (%)        |
|---------------------------------------------------------|---------------------|
| Total number of studies                                 | 45                  |
| Study size (range)                                      | 188,281(50-148,917) |
| Risk of Participation Bias scores                       |                     |
| <i>Low risk of bias</i>                                 | 25 (55.5%)          |
| <i>Moderate risk of bias</i>                            | 17 (37.7%)          |
| <i>High risk of bias</i>                                | 3 (6.8%)            |
| Study setting or sampling frame, n (%)                  |                     |
| <i>Workplace</i>                                        | 10 (22%)            |
| <i>Healthcare</i>                                       | 18 (40%)            |
| <i>Insurance database</i>                               | 14 (31%)            |
| <i>Population study</i>                                 | 3 (7%)              |
| % male (range)*                                         | 31% - 97%           |
| Studies using self-reported data on work absence, n (%) | 22 (49%)            |
| Geographic region, n (%)                                |                     |
| <i>North America</i>                                    | 19 (42%)            |
| <i>Europe</i>                                           | 21 (47%)            |
| <i>Other</i>                                            | 5 (11%)             |

\*From 44 studies. One study [26] only included females
