# Supplementary material for: Absence from work and return to work in people with back pain: a systematic review and meta-analysis
Source: HighWire-hosted journal article supplement (doi:10.1136/oemed-2013-101571), 2013-11-01
Supplement: oemed-2013-101571supp_table3.pdf [file oemed-2013-101571supp_table3.pdf]

**Online Table 3: Summary of results from studies reporting on duration of work absence**

| Study Ref                  | Sample size                                                              | Follow-up               | Results                                                                                            |
|----------------------------|--------------------------------------------------------------------------|-------------------------|----------------------------------------------------------------------------------------------------|
| <i>Insurance databases</i> |                                                                          |                         |                                                                                                    |
| [19]                       | 148917 claims                                                            | Over 1 year             | Median: 61 days                                                                                    |
| [22]                       | 2342 claims                                                              | Over 4 years            | Median: 11,13,14,15, 17.5days (per year)                                                           |
| [23]                       | 330 people                                                               | 6 months                | Median: 7 days (range 0-422)                                                                       |
| [30]                       | 201 claims                                                               | Over 2.5 years          | Mean 41.1 days (SD 83.5) for chiropractic claims,<br>Mean 39 days (SD 75) for medical claims       |
| [32]                       | 353 claims                                                               | Over 5 years            | Mean 3.7 days (SE 0.7) for organic LBP<br>Mean 1.2 days (SE 0.4) for non-specific LBP              |
| [34]                       | 50 people                                                                | 1 year                  | Mean 10.5 days (objective findings)<br>Mean 7 days (no objective findings)                         |
| [35]                       | 2291 claims                                                              | Over 3 years            | Mean: 20.73 (SD 38.9) first absence<br>Mean36.8 (SD61.4) second absence                            |
| <i>Health care</i>         |                                                                          |                         |                                                                                                    |
| [20]                       | 770 patients                                                             | 1 year                  | Median; 14 days                                                                                    |
| [26]                       | 791                                                                      | 6 months                | Median; 24 days (range 3-365) women<br>Median; 14 days (range 2-365) men                           |
| [28]                       | 104                                                                      | 3 months                | Mean: 6.6 days (manual labourers)<br>Mean: 3.6 days (professional or technical employees)          |
| [33]                       | 2487                                                                     | 42days ( $\pm 15$ days) | Mean: 9 days ( $\pm 7$ days)                                                                       |
| <i>Workplace</i>           |                                                                          |                         |                                                                                                    |
| [21]                       | 240 employees                                                            | 1 year                  | Median: 14 days (with restrictions)<br>Median: 15 days (without restrictions)                      |
| [24]                       | 615                                                                      | 6 months                | Median: 5 days (interquartile range 2-12 days)                                                     |
| [25]                       | 802                                                                      | 1 year                  | Median: 28 days (4.06 weeks)<br>Mean: 7.01 weeks (1-68 weeks)                                      |
| [27]                       | 1724                                                                     | 1 year                  | Mean: 21.2 days (range 0-365)                                                                      |
| [29]                       | 280 (work related back injuries)<br>740 (non-work related back injuries) | 1 year                  | Mean: 5.2 days (work related)<br>Mean: 5.1 days (non-work related)                                 |
| [31]                       | 2152                                                                     | 5 years                 | Mean: 5.6 days (age <45 years)<br>Mean: 9 days (age 45-54 years)<br>Mean: 8.5 days (age 55+ years) |
| <i>Population sample</i>   |                                                                          |                         |                                                                                                    |
| [18]                       | 357 participants                                                         | 1 year                  | Median: 12 days (men)<br>Median: 7 days (women)                                                    |

\* Range or Standard Deviation (SD) not reported
